# Supplementary material
Source: PubMed Central journal article supplement (PMC2708777)
Supplement: 0901435106_0901435106SI.pdf [file 0901435106_0901435106SI.pdf]

# Supporting Information

Horovitz et al. 10.1073/pnas.0901435106

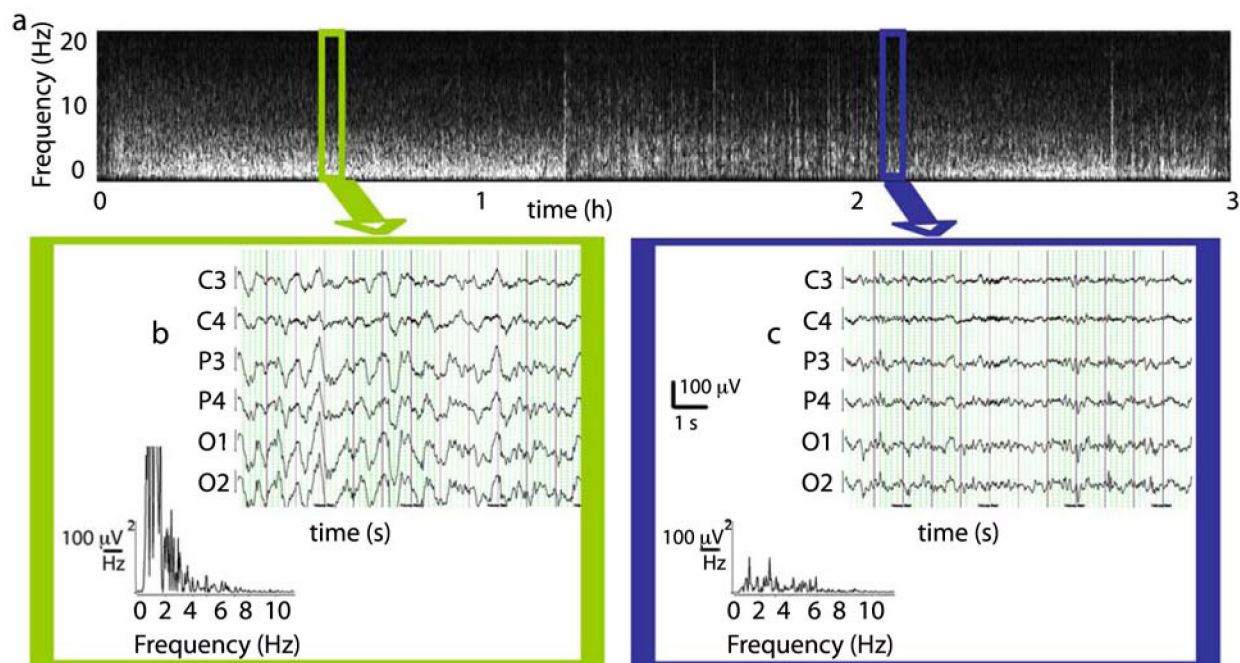

**Fig. S1.** Example of EEG data. (a) Time–frequency decomposition of the EEG (electrode C3 referenced to FCZ) for 1 subject over the 3 h of the experiment. (b) Time course of EEG and its spectrum during 12 s of deep sleep. (c) Time course of EEG and its spectrum during 12 s of light sleep.

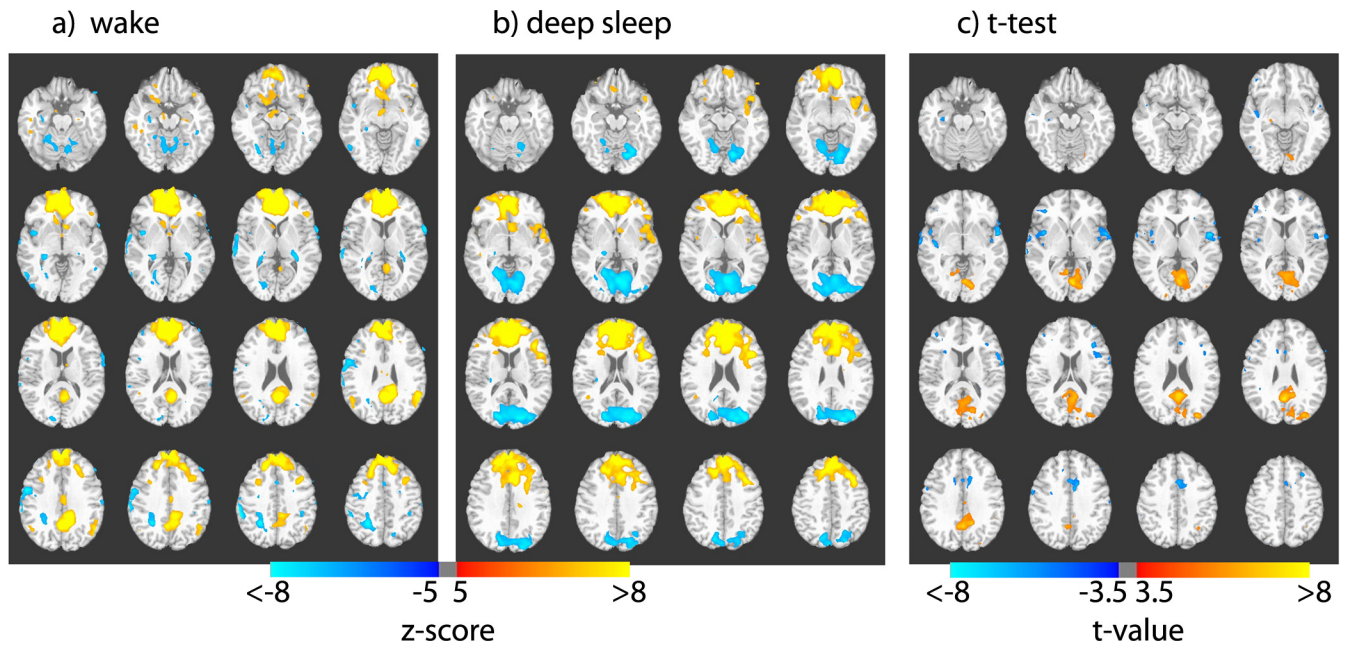

**Fig. S2.** DMN during wake and deep sleep. Composite maps showing correlations with MPFC/ACC during (a) wake and (b) deep sleep, and their significant difference as determined from statistical  $t$  test (c). A significant reduction of involvement of parietal regions is seen during sleep, whereas the frontal correlations are preserved. The  $Z$  maps in a and b are both thresholded at  $Z = \pm 5.0$ ; The  $t$  map in c is thresholded at  $t = \pm 3.5$ . Both positive (yellow-red) and negative (blue) correlations are shown.  $Z$  values,  $t$  values, and Talairach coordinates of all significant clusters are reported in Tables S3 and S4.

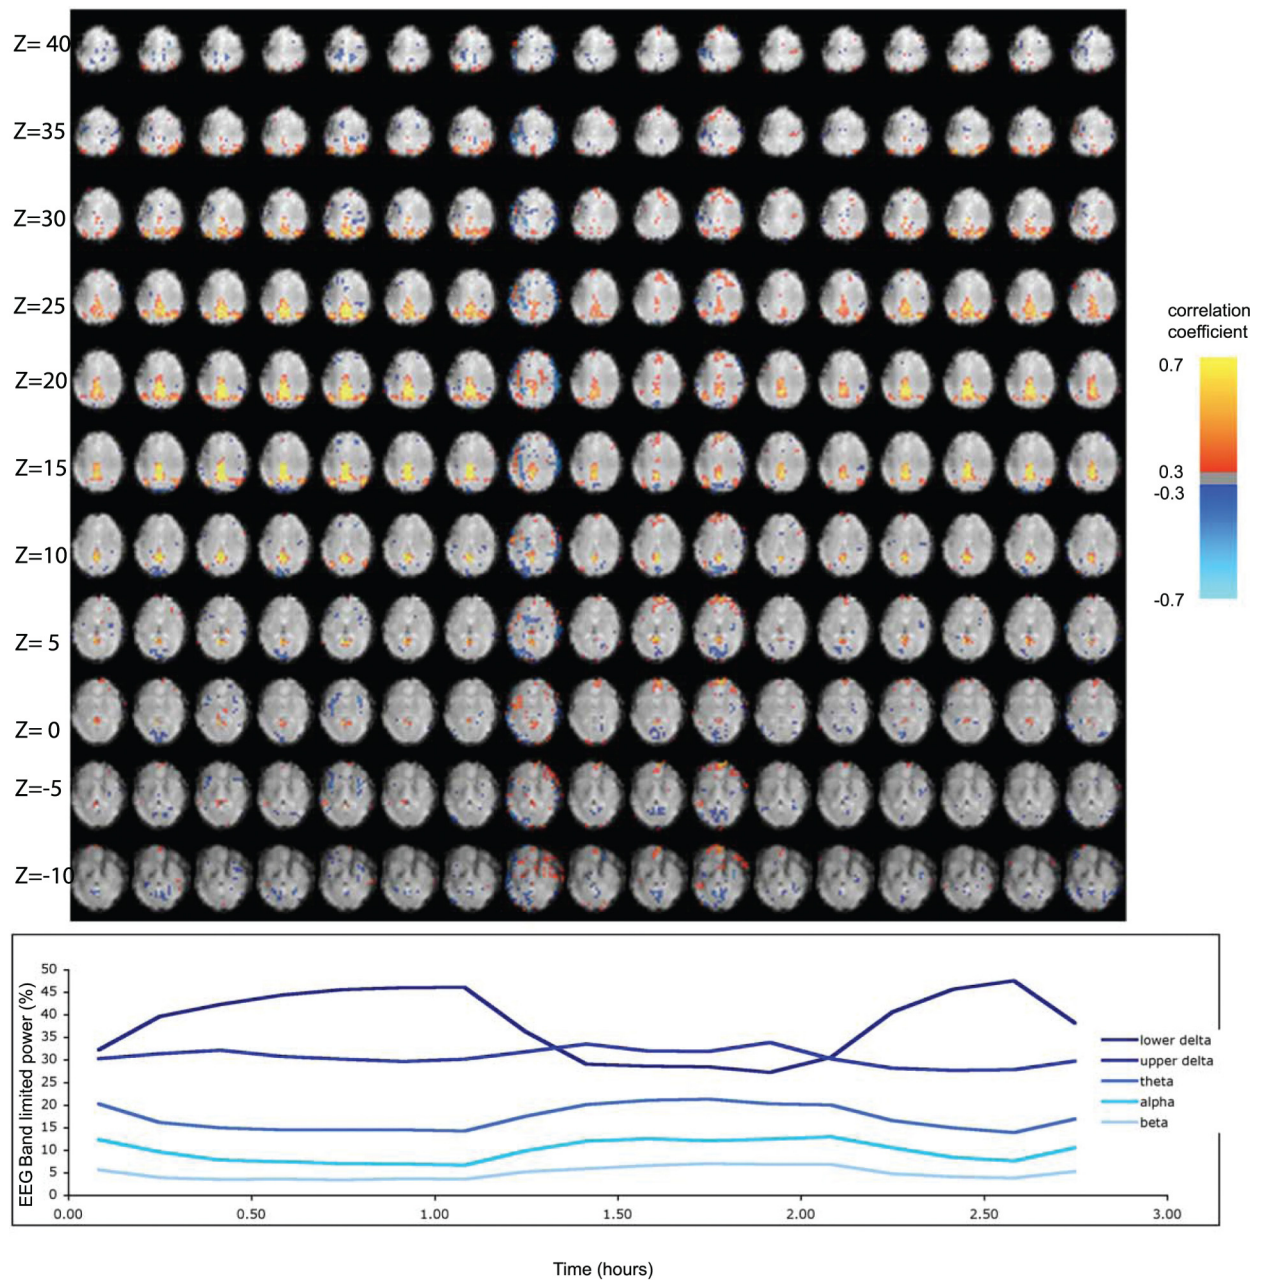

**Fig. S3.** Temporal evolution of connectivity within DMN at the single-subject level. (*Top*) Composite map of correlation with seed in PCC. Each image represents 10-min correlation maps. Periods of deep sleep (indicated by green bars) coincide with a reduced involvement of frontal regions. Corresponding levels of band-limited EEG activity are given in *Bottom* with the following definitions: lower delta: <2 Hz; upper delta: 2–4 Hz; theta: 4–8 Hz; alpha: 8–12 Hz; and beta: 12–20 Hz.

**Table S1. Sleep structure**

| Subject | Total recording time (min) | Sleep efficiency (%) | Sleep in stages 2–3–4 (min) |
|---------|----------------------------|----------------------|-----------------------------|
| 1       | 40                         | 0.00                 | 0                           |
| 2*      | 116                        | 95.86                | 46.6                        |
| 3       | 34                         | 50.59                | 12.6                        |
| 4†      | 140.4                      | 91.60                | 106.2                       |
| 5‡      | 83.8                       | 62.53                | 16.6                        |
| 6*      | 70.6                       | 85.84                | 53.8                        |
| 7†      | 74.8                       | 89.04                | 61                          |
| 8‡      | 69.8                       | 87.11                | 53.8                        |
| 9       | 90.5                       | No scores            | n/a                         |
| 10†     | 67                         | 95.22                | 58                          |
| 11*     | 103                        | 80.00                | 72.2                        |
| 12†     | 90                         | 95.78                | 65                          |
| 13      | 107                        | No scores            | n/a                         |
| 14†     | 49.2                       | 82.11                | 31.2                        |
| 15†     | 135                        | 95.85                | 94.6                        |
| 16*     | 128                        | 93.44                | 82.4                        |
| 17†     | 179.8                      | 97.22                | 135.8                       |
| 18      | 27.6                       | 7.97                 | 0                           |

Sleep efficiency represents the amount of time the subject slept as a percentage of the total recording time. Scoring was performed in 12-s intervals [Rechtschaffen A, Kales A, eds (1968) *A Manual of Standardized Terminology, Techniques and Scoring System for Sleep Stages of Human Subjects* (U. S. National Institute of Neurological Diseases and Blindness, Neurological Information Network, Bethesda, MD)].

\*Studies not included owing to imaging problems (artifacts or registration).

†Subjects included in the study.

‡Studies with not enough continuous stages 2–3–4 sleep. Sleep efficiency is defined as the fraction of the total recording that the subject spent sleeping, regardless of the sleep stage.

**Table S2. Sleep structure for the 7 subjects included in the deep-sleep analysis**

| Subject | Wake  | Stage 1 | Stage 2 | Stage 3 | Stage 4 | REM  |
|---------|-------|---------|---------|---------|---------|------|
| 4       | 8.40  | 12.25   | 35.90   | 25.21   | 14.53   | 3.70 |
| 7       | 10.96 | 7.49    | 7.22    | 6.95    | 67.38   | 0.00 |
| 10      | 4.78  | 8.66    | 82.69   | 3.88    | 0.00    | 0.00 |
| 12      | 4.22  | 23.56   | 68.22   | 3.56    | 0.44    | 0.00 |
| 14      | 17.07 | 19.51   | 30.08   | 28.86   | 4.47    | 0.00 |
| 15      | 4.15  | 18.22   | 67.41   | 2.67    | 0.00    | 7.56 |
| 17      | 2.78  | 15.13   | 38.15   | 29.59   | 7.79    | 6.56 |
| Average | 7.48  | 14.97   | 47.10   | 14.39   | 13.52   | 2.55 |

Values are percentage of total recording time spent at each sleep stage.

Table S3. Center of mass for voxel-by-voxel correlations with MPFC/ACC seed in wake and deep sleep

| Region                                         | Talairach coordinates |     |     | Cluster size (mm <sup>3</sup> ) | Peak Z value |
|------------------------------------------------|-----------------------|-----|-----|---------------------------------|--------------|
|                                                | x                     | y   | z   |                                 |              |
| Wake (n = 5)                                   |                       |     |     |                                 |              |
| R. medial frontal gyrus/anterior cingulate     | 2                     | 45  | 18  | 74,891                          | 22.59        |
| L. posterior cingulate                         | -5                    | -47 | 27  | 13,891                          | 11.11        |
| R. pre-central gyrus                           | 46                    | -13 | 40  | 7,687                           | -9.33        |
| R. cerebellum                                  | 0                     | -53 | -18 | 6,953                           | -6.45        |
| R. precuneus/superior parietal lobule          | 26                    | -48 | 42  | 5,282                           | -8.24        |
| L. supramarginal gyrus/angular gyrus           | -47                   | -55 | 30  | 2,563                           | 8.25         |
| R. cuneus/BA17                                 | 19                    | -75 | 10  | 1,801                           | -6.30        |
| R. superior temporal gyrus                     | 62                    | -18 | 7   | 1,590                           | -7.59        |
| R. hypothalamus                                | 5                     | -8  | -7  | 1,174                           | 6.87         |
| L. hippocampus/caudate                         | -27                   | -31 | 6   | 1,057                           | -7.03        |
| R. parahippocampal gyrus                       | 26                    | -34 | 3   | 1,038                           | -6.93        |
| L. inferior parietal lobule/post-central gyrus | -39                   | -35 | 47  | 1,020                           | -6.87        |
| L. precentral gyrus/inferior frontal gyrus     | -60                   | 7   | 12  | 975                             | -7.49        |
| R. middle frontal gyrus                        | 29                    | 13  | 37  | 923                             | 6.75         |
| R. superior temporal gyrus/angular gyrus       | 48                    | -57 | 27  | 844                             | 6.67         |
| L. inferior frontal gyrus                      | -44                   | 31  | 2   | 783                             | 6.68         |
| L. cingulate gyrus/BA23                        | -2                    | -14 | 32  | 776                             | 7.33         |
| R. insula                                      | 43                    | 3   | -1  | 757                             | -6.85        |
| R. middle occipital gyrus/BA19                 | 53                    | -61 | -3  | 610                             | -6.77        |
| R. fusiform gyrus                              | 29                    | -63 | -9  | 435                             | -6.41        |
| R. inferior/middle temporal gyrus              | 48                    | -33 | -13 | 333                             | 5.82         |
| L. inferior/middle temporal gyrus              | -50                   | -52 | -4  | 315                             | -6.03        |
| L. superior/middle frontal gyrus               | -16                   | 4   | 56  | 302                             | -6.17        |
| R. parahippocampal gyrus/hippocampus           | 30                    | -18 | -15 | 298                             | -6.21        |
| L. post-central gyrus/BA3                      | -59                   | -18 | 34  | 294                             | -6.06        |
| L. precuneus/superior parietal lobule          | -13                   | -66 | 45  | 287                             | -6.25        |
| L. inferior frontal gyrus                      | -37                   | 17  | -10 | 284                             | 7.00         |
| Deep sleep (n = 7)                             |                       |     |     |                                 |              |
| L. anterior cingulate/medial frontal gyrus     | -4                    | 39  | 21  | 111,589                         | 20.67        |
| L. cuneus/BA18                                 | -7                    | -70 | 16  | 66,048                          | -8.59        |
| L. insula                                      | -43                   | 5   | -2  | 5,500                           | 7.33         |
| R. postcentral gyrus                           | 22                    | -33 | 56  | 1,551                           | -6.30        |
| R. inferior frontal gyrus (O)                  | 47                    | 40  | 0   | 383                             | 6.09         |
| R. inferior frontal gyrus (T)                  | 49                    | 27  | 12  | 328                             | 7.30         |
| R. thalamus                                    | 20                    | -26 | 2   | 276                             | -6.25        |
| R. pre-central gyrus                           | 36                    | -17 | 55  | 259                             | -6.02        |

Threshold  $Z = \pm 5$ , cluster 250 voxels ( $1 \times 1 \times 1 \text{ mm}^3$ ).

**Table S4. Center of mass for voxel-by-voxel *t* test between wake and deep sleep maps of correlations with MPFC/ACC seed**

| Region                                                                                         | Talairach coordinates |     |    | Cluster size<br>(mm <sup>3</sup> ) | Peak<br><i>t</i> value |
|------------------------------------------------------------------------------------------------|-----------------------|-----|----|------------------------------------|------------------------|
|                                                                                                | x                     | y   | z  |                                    |                        |
| Areas significantly more correlated with MPFC/ACC during wake (positive <i>t</i> values)       |                       |     |    |                                    |                        |
| L. posterior cingulate                                                                         | -4                    | -61 | 16 | 18,407                             | 7.50                   |
| L. middle/superior occipital gyrus                                                             | -29                   | -79 | 24 | 1,436                              | 7.26                   |
| R. paracentral lobule/BA6/BA4                                                                  | 4                     | -33 | 64 | 538                                | 6.07                   |
| Areas significantly more correlated with MPFC/ACC during deep sleep (negative <i>t</i> values) |                       |     |    |                                    |                        |
| L. superior temporal gyrus                                                                     | -50                   | 1   | 3  | 2,276                              | -8.53                  |
| L. anterior/middle cingulate gyrus                                                             | -5                    | 11  | 36 | 2,213                              | -6.06                  |
| L. inferior frontal gyrus (O)                                                                  | -52                   | 6   | 16 | 1,144                              | -6.31                  |
| R. insula                                                                                      | 43                    | 0   | 4  | 1,064                              | -5.94                  |
|                                                                                                | 41                    | -12 | -2 | 506                                | -6.02                  |
| R. superior temporal gyrus                                                                     | 63                    | -7  | 1  | 677                                | -5.78                  |
| L. inferior/middle frontal gyrus                                                               | -35                   | 26  | 19 | 379                                | -5.56                  |
| R. middle frontal gyrus/BA10                                                                   | 41                    | 41  | 14 | 318                                | -6.17                  |

Threshold  $t = \pm 3.5$ , cluster 250 voxels ( $1 \times 1 \times 1 \text{ mm}^3$ ).
